# Supplementary material
Source: PubMed Central journal article supplement (PMC1502526)

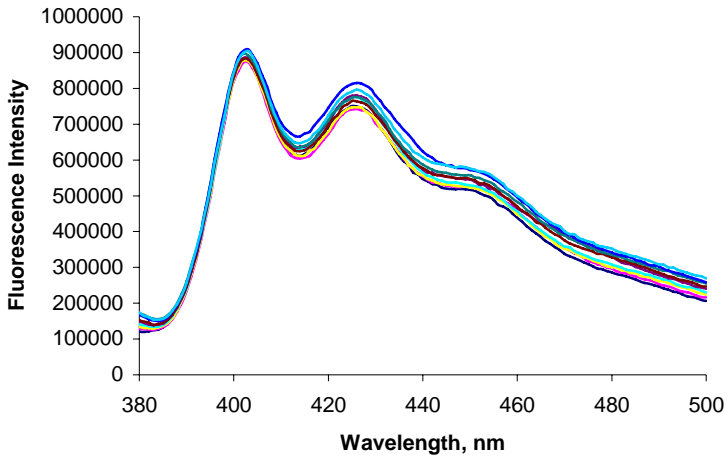

Supplement: pnas_0603758103_10.pdf [file pnas_0603758103_10.pdf]

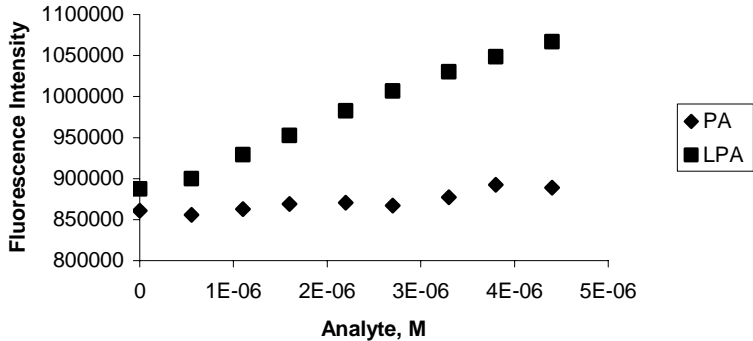

Supplement: pnas_0603758103_11.pdf [file pnas_0603758103_11.pdf]

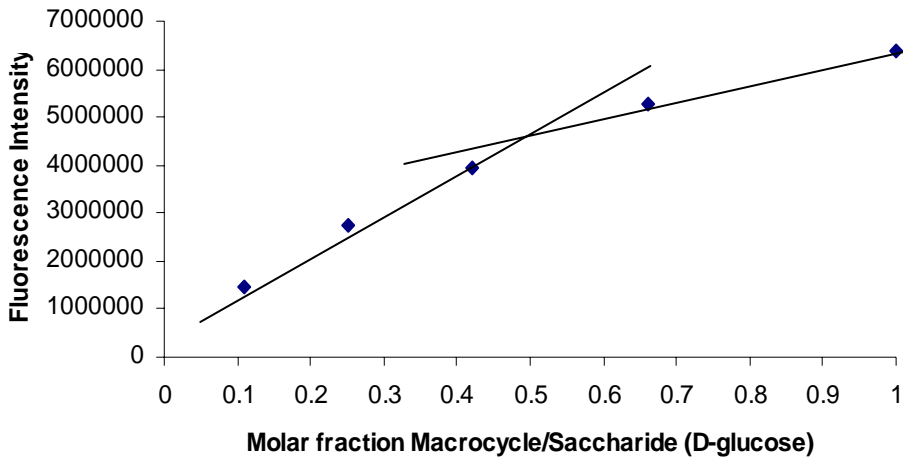

Supplement: pnas_0603758103_12.pdf [file pnas_0603758103_12.pdf]

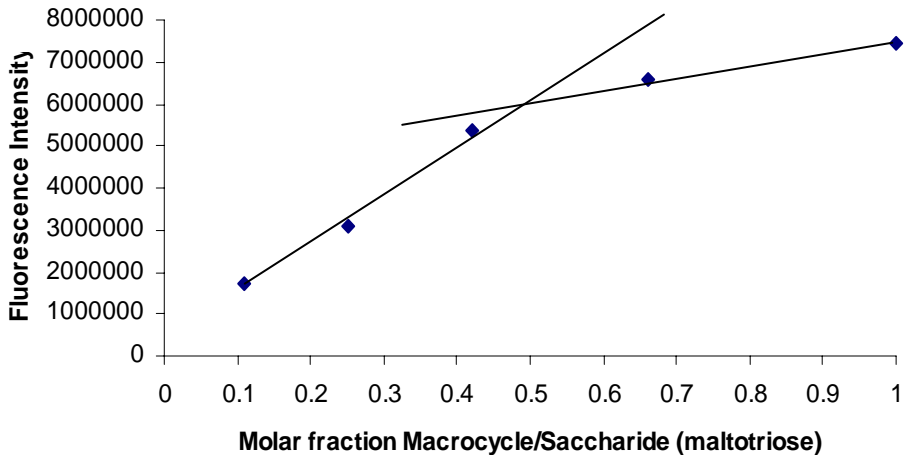

Supplement: pnas_0603758103_13.pdf [file pnas_0603758103_13.pdf]

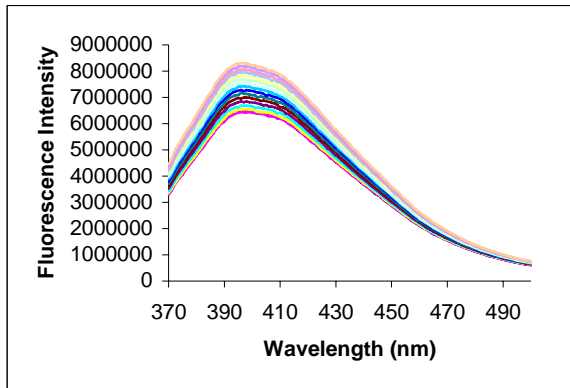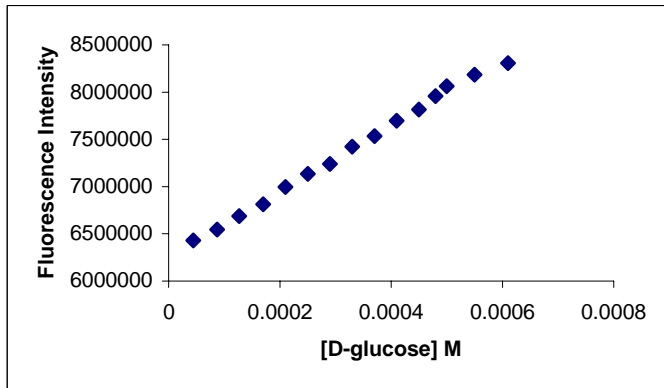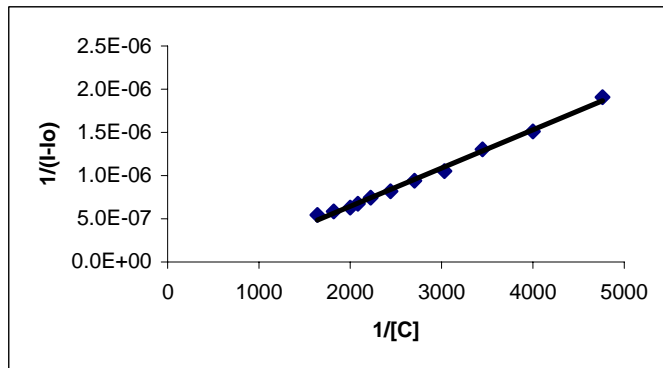

Supplement: pnas_0603758103_14.pdf [file pnas_0603758103_14.pdf]

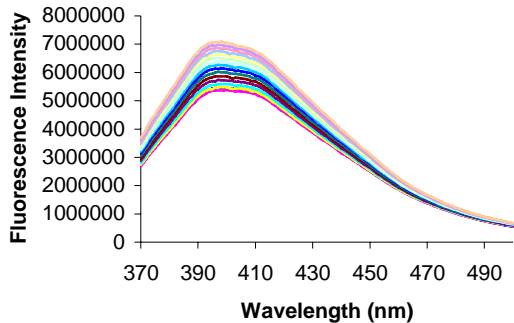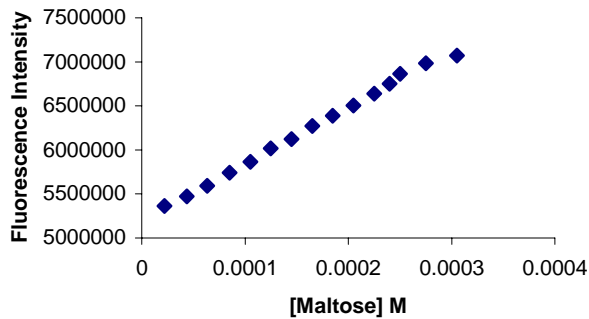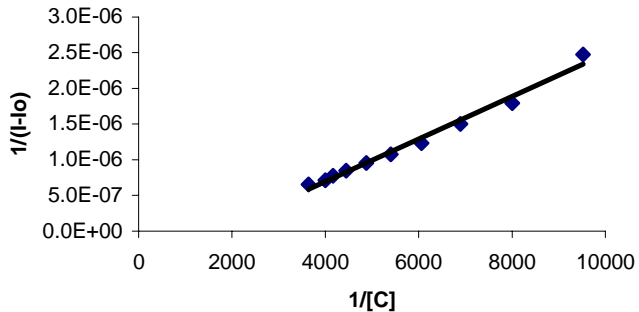

Supplement: pnas_0603758103_15.pdf [file pnas_0603758103_15.pdf]

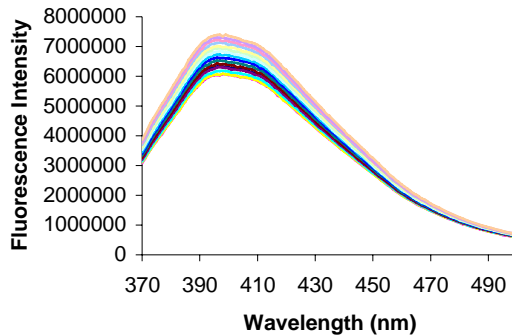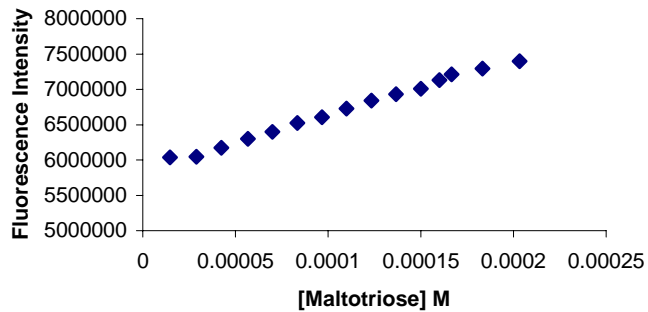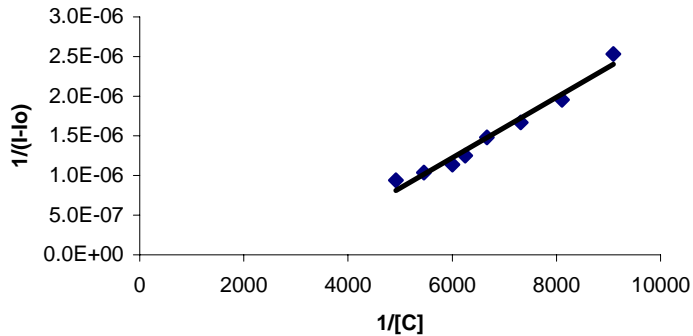

Supplement: pnas_0603758103_16.pdf [file pnas_0603758103_16.pdf]

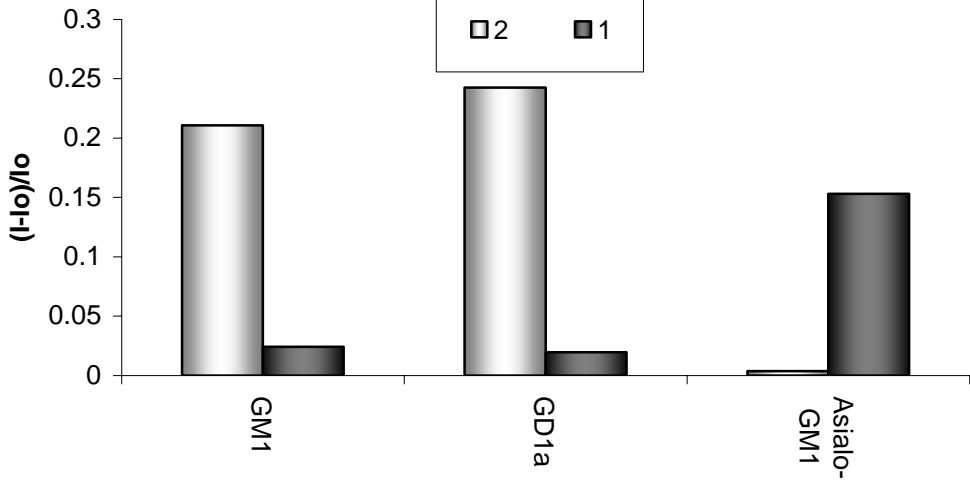

Supplement: pnas_0603758103_17.pdf [file pnas_0603758103_17.pdf]

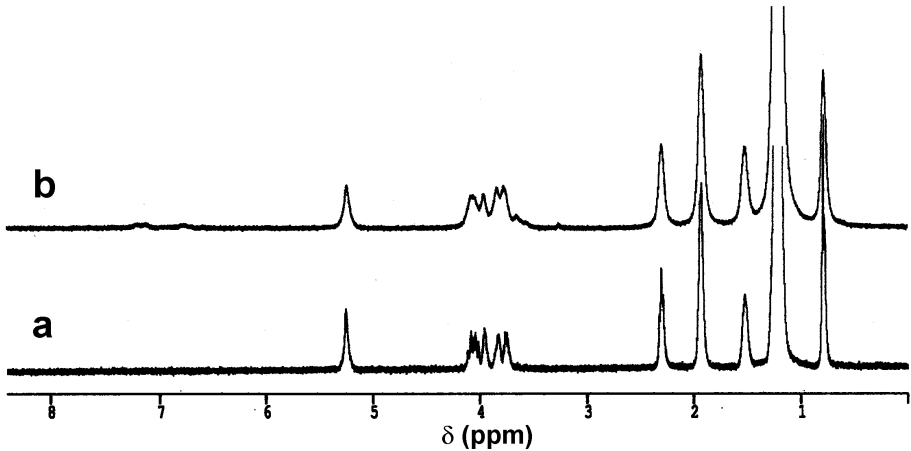

Supplement: pnas_0603758103_18.pdf [file pnas_0603758103_18.pdf]

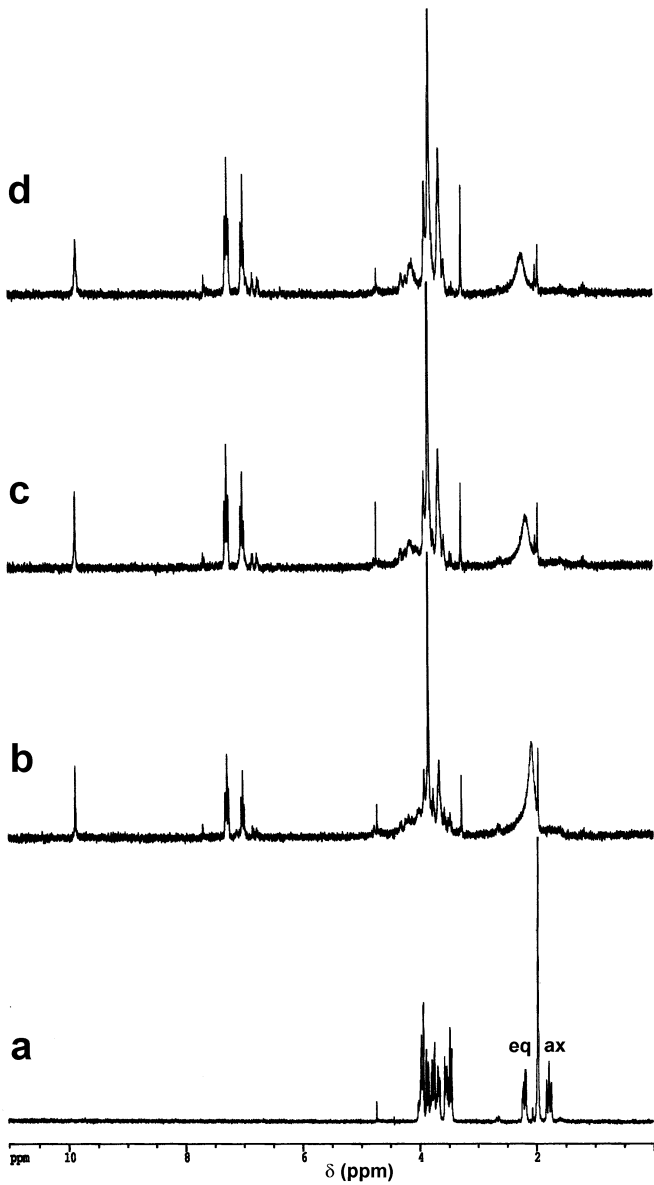

Supplement: pnas_0603758103_19.pdf [file pnas_0603758103_19.pdf]

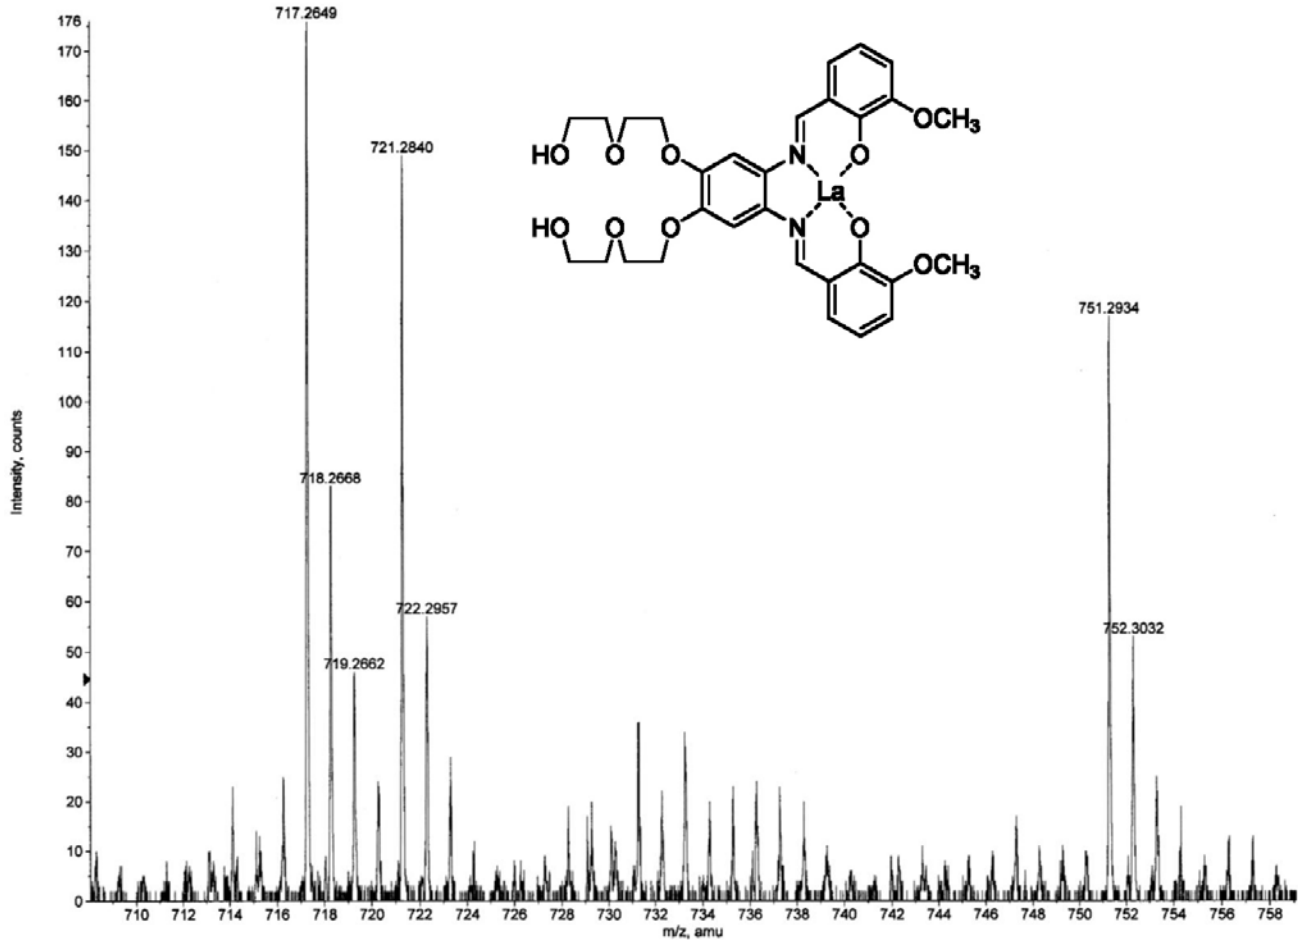

Supplement: pnas_0603758103_2.pdf [file pnas_0603758103_2.pdf]

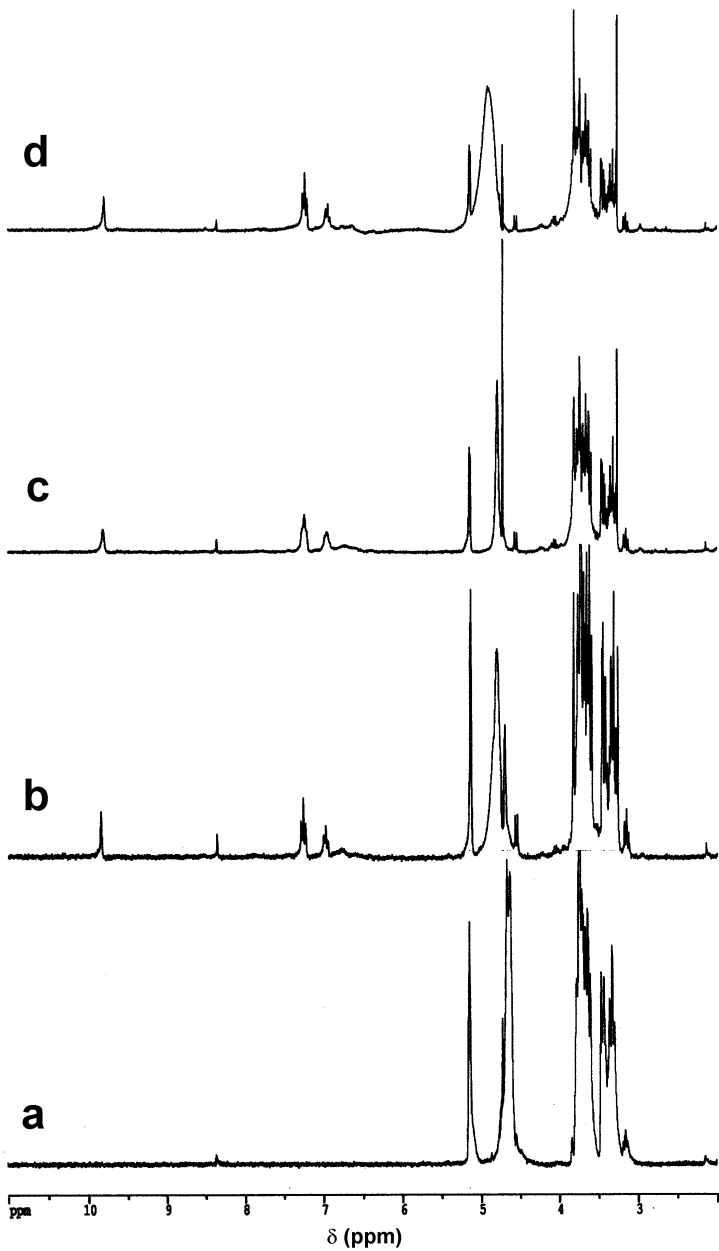

Supplement: pnas_0603758103_20.pdf [file pnas_0603758103_20.pdf]

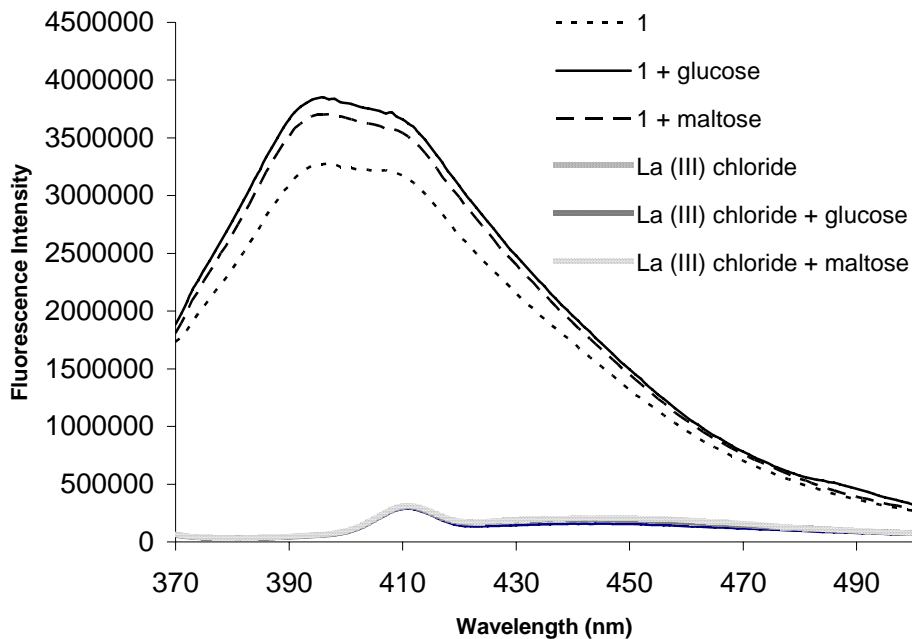

Supplement: pnas_0603758103_21.pdf [file pnas_0603758103_21.pdf]

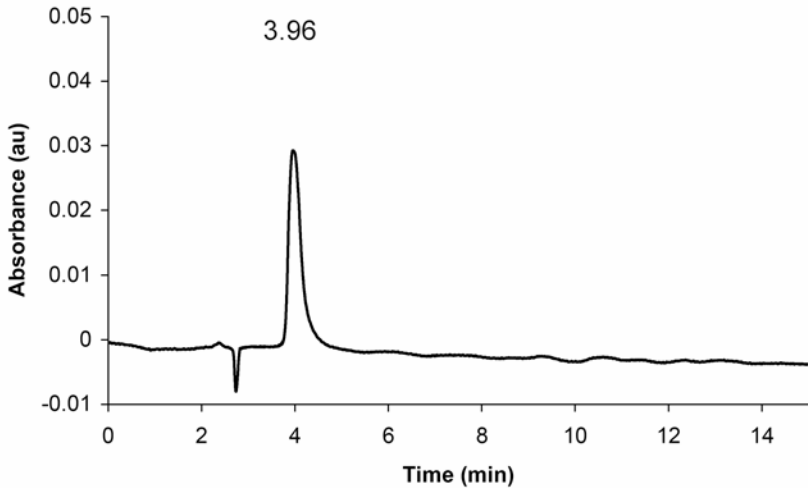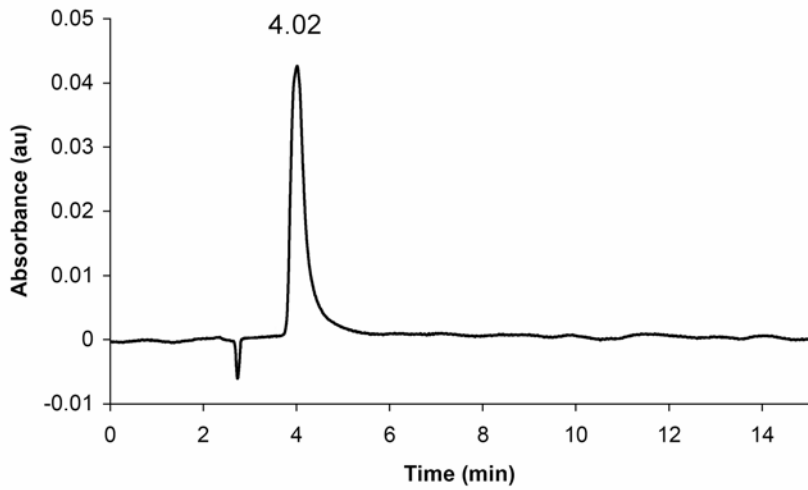

Supplement: pnas_0603758103_22.pdf [file pnas_0603758103_22.pdf]

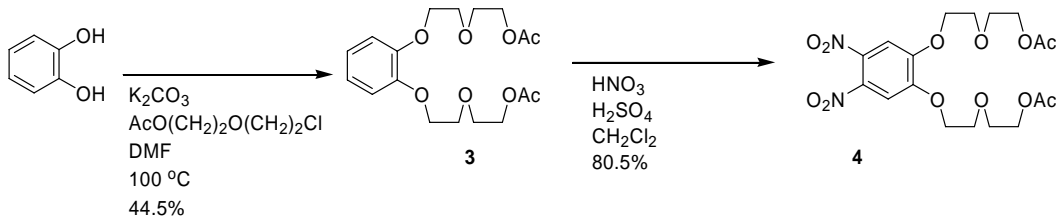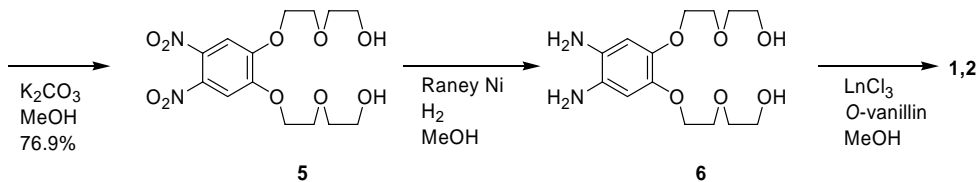

Supplement: pnas_0603758103_23.pdf [file pnas_0603758103_23.pdf]

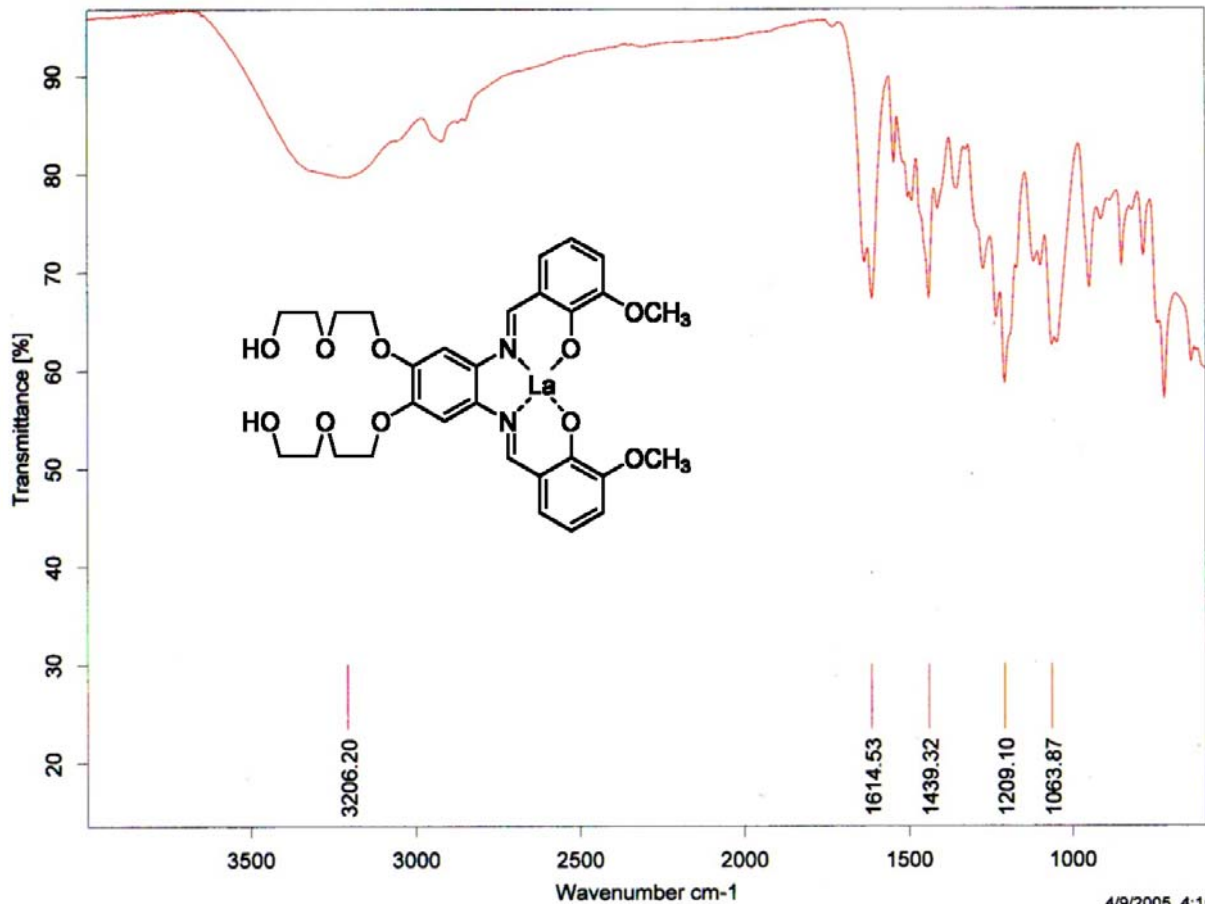

Supplement: pnas_0603758103_3.pdf [file pnas_0603758103_3.pdf]

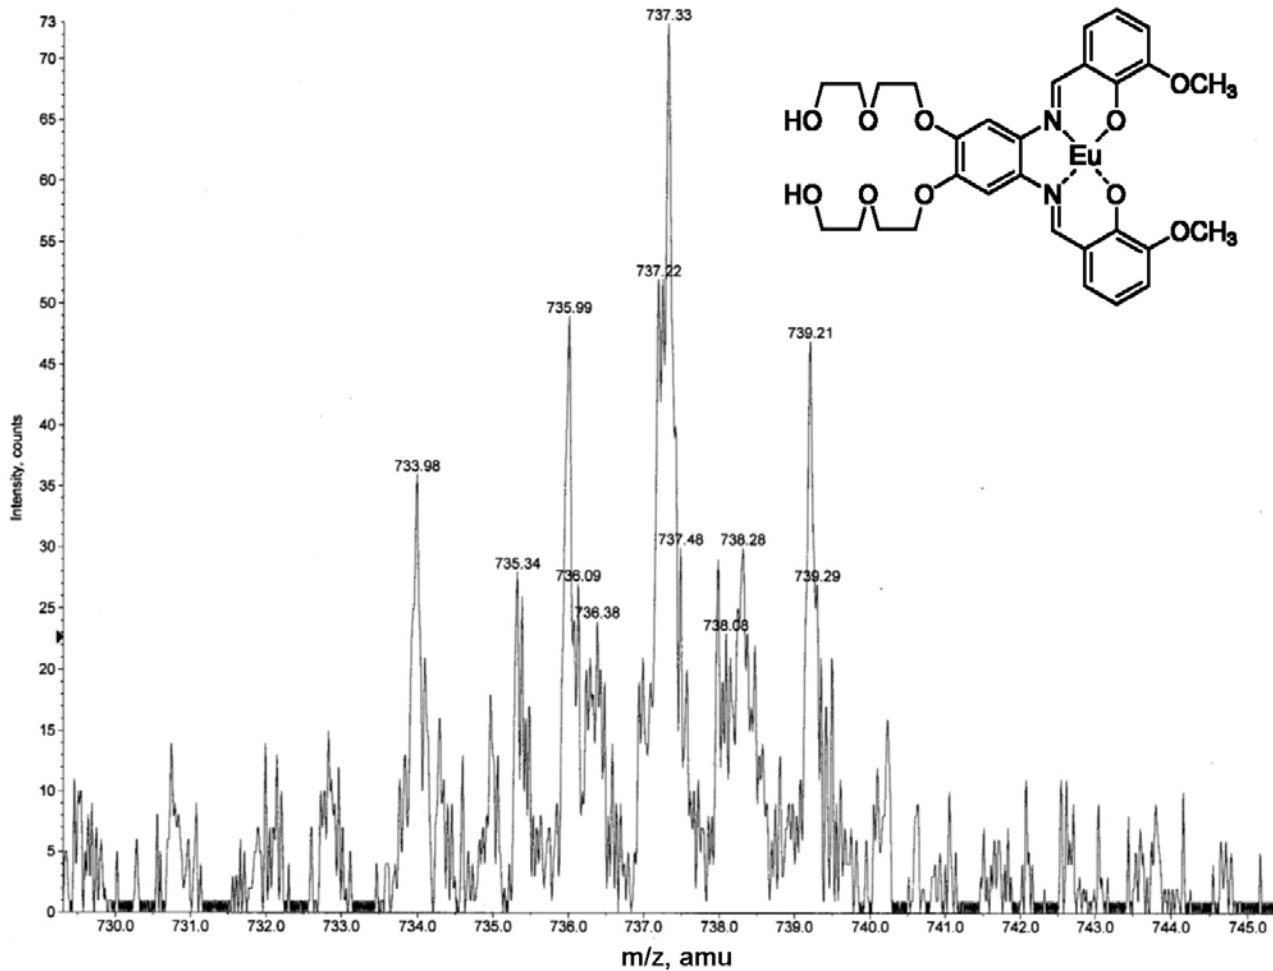

Supplement: pnas_0603758103_5.pdf [file pnas_0603758103_5.pdf]

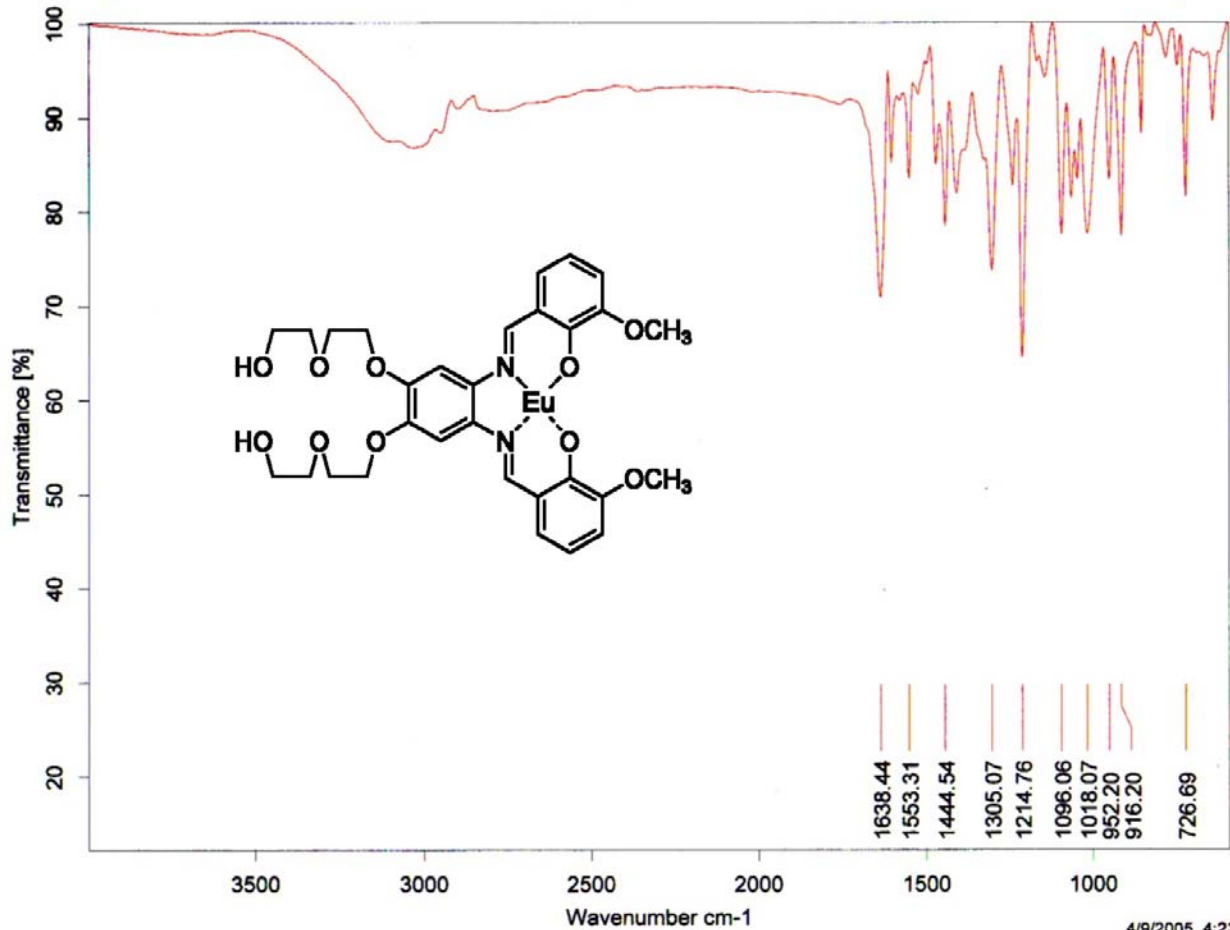

Supplement: pnas_0603758103_6.pdf [file pnas_0603758103_6.pdf]

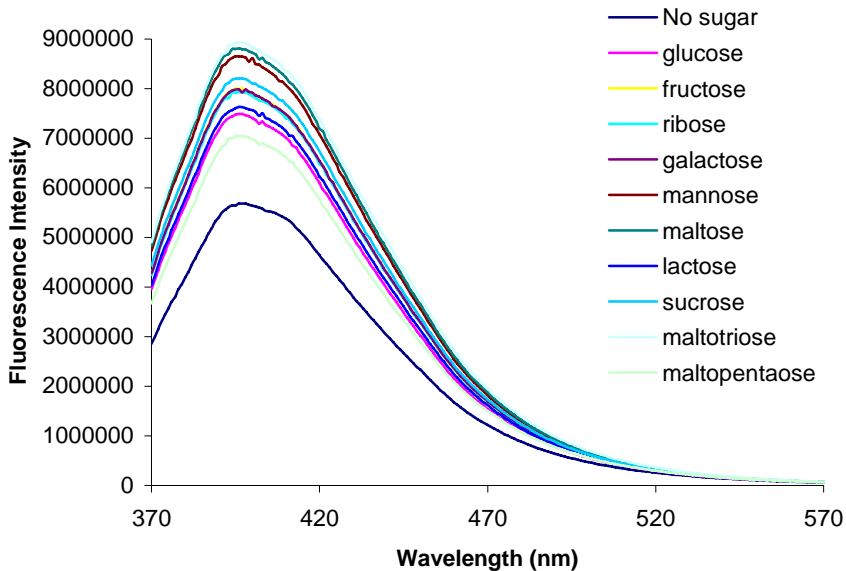

Supplement: pnas_0603758103_7.pdf [file pnas_0603758103_7.pdf]

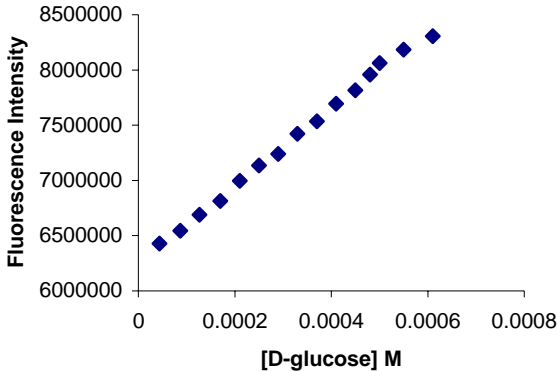

Supplement: pnas_0603758103_8.pdf [file pnas_0603758103_8.pdf]

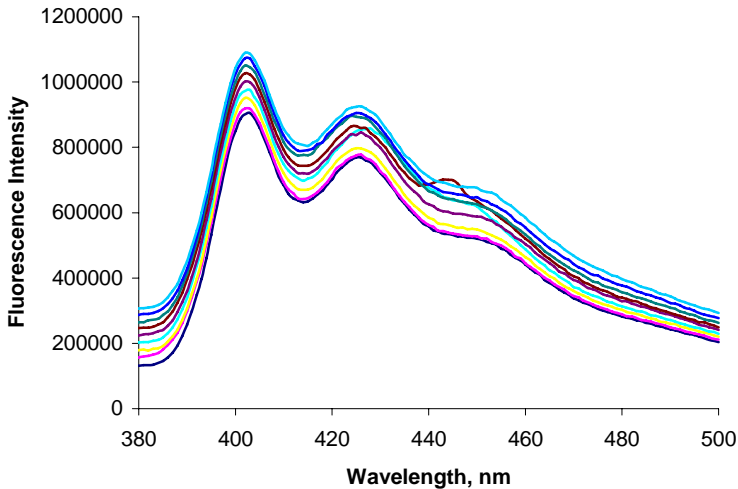

Supplement: pnas_0603758103_9.pdf [file pnas_0603758103_9.pdf]
